# Supplementary material for: HoBi-like Pestivirus Is Highly Prevalent in Cattle Herds in the Amazon Region (Northern Brazil)
Source: MDPI journal article supplement (doi:10.3390/v15020453), 2023-02-06
Supplement: s1 [file s1]

Table S3: Individual results for VNT titers for BVDV-1, 2 and HoBiPeV.

| Sample ID | State* | City        | VNT titers**          |                        |                              |
|-----------|--------|-------------|-----------------------|------------------------|------------------------------|
|           |        |             | BVDV-1a (strain C24V) | BVDV-2b (strain SV253) | HoBiPeV (strain Italy 83/10) |
| 1         | RR     | Amajari     | No Ab                 | No Ab                  | No Ab                        |
| 2         | RR     | Amajari     | 512                   | No Ab                  | 2048                         |
| 3         | RR     | Amajari     | No Ab                 | No Ab                  | No Ab                        |
| 4         | RR     | Amajari     | 128                   | 16                     | 128                          |
| 5         | RR     | Amajari     | 128                   | No Ab                  | No Ab                        |
| 6         | RR     | Alto Alegre | 256                   | 32                     | No Ab                        |
| 7         | RR     | Alto Alegre | 32                    | No Ab                  | No Ab                        |
| 8         | RR     | Alto Alegre | No Ab                 | No Ab                  | No Ab                        |
| 9         | RR     | Alto Alegre | No Ab                 | No Ab                  | No Ab                        |
| 10        | RR     | Alto Alegre | No Ab                 | No Ab                  | No Ab                        |
| 11        | RR     | Alto Alegre | No Ab                 | 128                    | No Ab                        |
| 12        | RR     | Alto Alegre | 32                    | 128                    | No Ab                        |
| 13        | RR     | Alto Alegre | No Ab                 | 64                     | No Ab                        |
| 14        | RR     | Alto Alegre | No Ab                 | 64                     | No Ab                        |
| 15        | RR     | Boa Vista   | 16                    | 64                     | 128                          |
| 16        | RR     | Boa Vista   | No Ab                 | 32                     | 64                           |
| 17        | RR     | Bonfim      | No Ab                 | No Ab                  | No Ab                        |
| 18        | RR     | Bonfim      | No Ab                 | No Ab                  | No Ab                        |
| 19        | RR     | Bonfim      | No Ab                 | No Ab                  | No Ab                        |
| 20        | RR     | Bonfim      | 256                   | 512                    | 128                          |
| 21        | RR     | Cantá       | No Ab                 | 32                     | No Ab                        |
| 22        | RR     | Cantá       | No Ab                 | 128                    | No Ab                        |
| 23        | RR     | Cantá       | 32                    | 1024                   | 128                          |
| 24        | RR     | Cantá       | No Ab                 | 32                     | No Ab                        |
| 25        | RR     | Cantá       | No Ab                 | 32                     | No Ab                        |
| 26        | RR     | Cantá       | 32                    | 64                     | No Ab                        |
| 27        | RR     | Cantá       | 32                    | No Ab                  | No Ab                        |
| 28        | RR     | Caroebe     | No Ab                 | No Ab                  | 128                          |
| 29        | RR     | Caroebe     | No Ab                 | 64                     | No Ab                        |
| 30        | RR     | Caroebe     | No Ab                 | No Ab                  | 512                          |

|    |    |                    |       |       |       |
|----|----|--------------------|-------|-------|-------|
| 31 | RR | Iracema            | No Ab | No Ab | No Ab |
| 32 | RR | Caroebe            | 32    | 128   | 512   |
| 33 | RR | Caroebe            | No Ab | No Ab | No Ab |
| 34 | RR | Caroebe            | No Ab | No Ab | No Ab |
| 35 | RR | Caroebe            | No Ab | 32    | No Ab |
| 36 | RR | Iracema            | 512   | 64    | 512   |
| 37 | RR | Iracema            | 256   | 128   | 1024  |
| 38 | RR | Mucajaí            | No Ab | 8     | No Ab |
| 39 | RR | Mucajaí            | No Ab | 32    | 512   |
| 40 | RR | Normandia          | 256   | 512   | 64    |
| 41 | RR | Normandia          | No Ab | 32    | 256   |
| 42 | RR | Pacaraima          | 64    | 128   | No Ab |
| 43 | RR | São João da Baliza | 1024  | 128   | No Ab |
| 44 | RR | São Luiz           | 128   | 512   | No Ab |
| 45 | RR | São Luiz           | No Ab | No Ab | No Ab |
| 46 | RR | São Luiz           | No Ab | No Ab | No Ab |
| 47 | RR | Uiramutã           | No Ab | No Ab | No Ab |
| 48 | PA | Afuá               | No Ab | 32    | No Ab |
| 49 | PA | Breves             | No Ab | 16    | No Ab |
| 50 | PA | Chaves             | No Ab | No Ab | 256   |
| 51 | PA | Chaves             | 64    | 64    | No Ab |
| 52 | PA | Chaves             | 64    | No Ab | 128   |
| 53 | PA | Chaves             | No Ab | No Ab | No Ab |
| 54 | PA | Chaves             | No Ab | 128   | No Ab |
| 55 | PA | Chaves             | 256   | 1024  | 256   |
| 56 | PA | Chaves             | 64    | 128   | 128   |
| 57 | PA | Chaves             | 64    | 64    | 128   |
| 58 | PA | Chaves             | No Ab | 128   | No Ab |
| 59 | PA | Chaves             | No Ab | No Ab | 32    |
| 60 | PA | Chaves             | No Ab | 16    | No Ab |
| 61 | PA | Chaves             | No Ab | No Ab | 64    |
| 62 | PA | Chaves             | No Ab | 512   | No Ab |
| 63 | PA | Chaves             | No Ab | 16    | 128   |
| 64 | PA | Chaves             | 64    | No Ab | 128   |
| 65 | PA | Chaves             | 64    | No Ab | No Ab |
| 66 | PA | Chaves             | No Ab | No Ab | No Ab |

|     |    |                    |       |       |       |
|-----|----|--------------------|-------|-------|-------|
| 67  | PA | Gurupá             | 16    | No Ab | 8     |
| 68  | PA | Gurupá             | No Ab | No Ab | No Ab |
| 69  | PA | Gurupá             | No Ab | 512   | No Ab |
| 70  | PA | Melgaço            | No Ab | 512   | 512   |
| 71  | RR | Amajari            | 8     | No Ab | No Ab |
| 72  | RR | Boa Vista          | 16    | No Ab | No Ab |
| 73  | RR | Bonfim             | 32    | 128   | No Ab |
| 74  | RR | Bonfim             | 32    | 16    | No Ab |
| 75  | RR | Cantá              | 128   | 128   | No Ab |
| 76  | RR | Cantá              | No Ab | 128   | No Ab |
| 77  | RR | Caracarái          | 64    | 128   | 8     |
| 78  | AM | Envira             | 32    | No Ab | No Ab |
| 79  | RR | Caracarái          | 256   | 64    | No Ab |
| 80  | RR | Caracarái          | No Ab | 32    | 32    |
| 81  | RR | Caroebe            | 64    | 128   | No Ab |
| 82  | RR | Caroebe            | 128   | 32    | No Ab |
| 83  | RR | Caroebe            | No Ab | No Ab | 16    |
| 84  | RR | Iracema            | No Ab | No Ab | No Ab |
| 85  | RR | Iracema            | No Ab | No Ab | No Ab |
| 86  | RR | Mucajái            | No Ab | No Ab | No Ab |
| 87  | RR | Mucajái            | No Ab | No Ab | No Ab |
| 88  | RR | Mucajái            | 16    | 16    | 128   |
| 89  | RR | Mucajái            | 128   | No Ab | No Ab |
| 90  | RR | Mucajái            | 32    | No Ab | No Ab |
| 91  | RR | Mucajái            | No Ab | No Ab | No Ab |
| 92  | RR | Normandia          | No Ab | No Ab | No Ab |
| 93  | RR | Rorainópolis       | 128   | No Ab | 8     |
| 94  | RR | Rorainópolis       | 64    | 256   | 512   |
| 95  | RR | Rorainópolis       | 256   | 256   | 512   |
| 96  | RR | Rorainópolis       | 64    | No Ab | No Ab |
| 97  | RR | Rorainópolis       | 1024  | No Ab | No Ab |
| 98  | RR | Rorainópolis       | 16    | No Ab | No Ab |
| 99  | RR | São João da Baliza | 32    | No Ab | No Ab |
| 100 | RR | São João da Baliza | 128   | No Ab | No Ab |
| 101 | RR | São Luiz           | 64    | No Ab | No Ab |
| 102 | RR | São Luiz           | No Ab | No Ab | No Ab |

|     |    |                         |       |       |       |
|-----|----|-------------------------|-------|-------|-------|
| 103 | AP | Cutias                  | 64    | No Ab | No Ab |
| 104 | AP | Cutias                  | 32    | No Ab | No Ab |
| 105 | AP | Cutias                  | 16    | No Ab | No Ab |
| 106 | AP | Cutias                  | 512   | No Ab | 512   |
| 107 | AP | Ferreira Gomes          | 256   | 128   | No Ab |
| 108 | AP | Itaubal                 | No Ab | 64    | No Ab |
| 109 | AP | Macapá                  | 512   | 32    | No Ab |
| 110 | AP | Macapá                  | No Ab | No Ab | No Ab |
| 111 | AP | Macapá                  | 256   | 64    | No Ab |
| 112 | AP | Macapá                  | 16    | No Ab | No Ab |
| 113 | AP | Macapá                  | 32    | 64    | No Ab |
| 114 | AP | Mazagão                 | No Ab | No Ab | No Ab |
| 115 | AP | Mazagão                 | No Ab | 256   | No Ab |
| 116 | AP | Porto Grande            | 256   | 256   | 1024  |
| 117 | AP | Santana                 | No Ab | No Ab | No Ab |
| 118 | AP | Tartarugalzinho         | No Ab | 8     | No Ab |
| 119 | AP | Tartarugalzinho         | No Ab | No Ab | No Ab |
| 120 | AP | Tartarugalzinho         | No Ab | No Ab | 16    |
| 121 | AP | Tartarugalzinho         | No Ab | No Ab | 8     |
| 122 | AP | Vitória do Jari         | No Ab | No Ab | 8     |
| 123 | AP | Vitória do Jari         | No Ab | 16    | No Ab |
| 124 | PA | Faro                    | No Ab | No Ab | 8     |
| 125 | PA | Terra Santa             | No Ab | 32    | 64    |
| 126 | PA | Terra Santa             | 512   | 256   | 512   |
| 127 | PA | Terra Santa             | No Ab | 64    | 8     |
| 128 | PA | Terra Santa             | No Ab | No Ab | No Ab |
| 129 | PA | Terra Santa             | No Ab | No Ab | No Ab |
| 130 | AP | Amapá                   | No Ab | 32    | No Ab |
| 131 | AP | Amapá                   | No Ab | 8     | 8     |
| 132 | AP | Amapá                   | No Ab | No Ab | 8     |
| 133 | AP | Amapá                   | 512   | 2048  | 1024  |
| 134 | AP | Pedra Branca do Amapari | No Ab | No Ab | No Ab |
| 135 | AP | Cutias                  | No Ab | No Ab | No Ab |
| 136 | AP | Cutias                  | 128   | 128   | 512   |
| 137 | AP | Itaubal                 | No Ab | No Ab | 8     |
| 138 | AP | Laranjal do Jari        | No Ab | No Ab | No Ab |

|     |    |                           |       |       |       |
|-----|----|---------------------------|-------|-------|-------|
| 139 | AP | Macapá                    | No Ab | No Ab | 16    |
| 140 | AP | Macapá                    | No Ab | No Ab | No Ab |
| 141 | AP | Macapá                    | No Ab | No Ab | No Ab |
| 142 | AP | Macapá                    | No Ab | No Ab | 8     |
| 143 | AP | Macapá                    | No Ab | No Ab | No Ab |
| 144 | AP | Macapá                    | No Ab | No Ab | No Ab |
| 145 | AP | Macapá                    | No Ab | No Ab | No Ab |
| 146 | AP | Macapá                    | No Ab | No Ab | No Ab |
| 147 | AP | Macapá                    | No Ab | 32    | 128   |
| 148 | AP | Mazagão                   | No Ab | No Ab | No Ab |
| 149 | AP | Mazagão                   | No Ab | No Ab | No Ab |
| 150 | AP | Porto Grande              | No Ab | No Ab | No Ab |
| 151 | AP | Porto Grande              | No Ab | No Ab | No Ab |
| 152 | AP | Santana                   | 256   | 128   | 256   |
| 153 | AP | Tartarugalzinho           | No Ab | No Ab | No Ab |
| 154 | AP | Tartarugalzinho           | 1024  | 256   | 256   |
| 155 | AP | Tartarugalzinho           | 512   | 1024  | 2048  |
| 156 | AP | Tartarugalzinho           | No Ab | No Ab | No Ab |
| 157 | AP | Tartarugalzinho           | 1024  | 512   | 2048  |
| 158 | AP | Tartarugalzinho           | No Ab | No Ab | No Ab |
| 159 | AP | Tartarugalzinho           | No Ab | No Ab | 8     |
| 160 | AP | Vitória do Jari           | No Ab | No Ab | 8     |
| 161 | AP | Amapá                     | No Ab | No Ab | No Ab |
| 162 | AP | Amapá                     | No Ab | No Ab | No Ab |
| 163 | AP | Laranjal do Jari          | No Ab | No Ab | No Ab |
| 164 | AP | Macapá                    | No Ab | No Ab | No Ab |
| 165 | AP | Vitória do Jari           | No Ab | No Ab | No Ab |
| 166 | AM | Santa Isabel do Rio Negro | No Ab | No Ab | No Ab |
| 167 | AM | Carauari                  | No Ab | No Ab | 8     |
| 168 | AM | Carauari                  | No Ab | No Ab | 8     |
| 169 | AM | Carauari                  | No Ab | No Ab | No Ab |
| 170 | AM | Carauari                  | No Ab | No Ab | 16    |
| 171 | AM | Carauari                  | No Ab | No Ab | No Ab |
| 172 | AM | Envira                    | No Ab | No Ab | No Ab |
| 173 | AM | Envira                    | No Ab | No Ab | 8     |
| 174 | AM | Envira                    | No Ab | No Ab | 8     |

|     |    |          |       |       |       |
|-----|----|----------|-------|-------|-------|
| 175 | AM | Envira   | 512   | 256   | 512   |
| 176 | AM | Envira   | 512   | 64    | 1024  |
| 177 | AM | Envira   | No Ab | No Ab | No Ab |
| 178 | AM | Envira   | No Ab | No Ab | No Ab |
| 179 | AM | Envira   | No Ab | No Ab | No Ab |
| 180 | AM | Envira   | No Ab | No Ab | No Ab |
| 181 | AM | Envira   | No Ab | 128   | 128   |
| 182 | AM | Envira   | No Ab | No Ab | 8     |
| 183 | AM | Envira   | No Ab | No Ab | No Ab |
| 184 | AM | Envira   | No Ab | No Ab | No Ab |
| 185 | AM | Envira   | No Ab | No Ab | No Ab |
| 186 | AM | Envira   | No Ab | No Ab | No Ab |
| 187 | AM | Envira   | No Ab | No Ab | No Ab |
| 188 | AM | Humaitá  | 256   | No Ab | No Ab |
| 189 | AM | Humaitá  | No Ab | No Ab | No Ab |
| 190 | AM | Humaitá  | No Ab | No Ab | No Ab |
| 191 | AM | Humaitá  | No Ab | No Ab | No Ab |
| 192 | AM | Ipixuna  | No Ab | No Ab | No Ab |
| 193 | AM | Ipixuna  | No Ab | No Ab | No Ab |
| 194 | AM | Ipixuna  | No Ab | No Ab | No Ab |
| 195 | AM | Ipixuna  | No Ab | No Ab | No Ab |
| 196 | AM | Ipixuna  | No Ab | No Ab | No Ab |
| 197 | AM | Ipixuna  | No Ab | No Ab | No Ab |
| 198 | AM | Ipixuna  | No Ab | No Ab | No Ab |
| 199 | AM | Ipixuna  | No Ab | No Ab | No Ab |
| 200 | AM | Pauini   | No Ab | No Ab | No Ab |
| 201 | AM | Pauini   | No Ab | No Ab | No Ab |
| 202 | AM | Pauini   | No Ab | No Ab | No Ab |
| 203 | AM | Pauini   | No Ab | No Ab | No Ab |
| 204 | AM | Pauini   | No Ab | No Ab | No Ab |
| 205 | AM | Coari    | No Ab | No Ab | No Ab |
| 206 | AM | Coari    | No Ab | No Ab | No Ab |
| 207 | AM | Irاندوبا | No Ab | No Ab | No Ab |
| 208 | AM | Irاندوبا | No Ab | No Ab | No Ab |
| 209 | AM | Juruá    | No Ab | No Ab | No Ab |
| 210 | AM | Juruá    | No Ab | No Ab | No Ab |

|     |    |                       |       |       |       |
|-----|----|-----------------------|-------|-------|-------|
| 211 | AM | Manicoré              | No Ab | No Ab | No Ab |
| 212 | AM | Manicoré              | No Ab | No Ab | No Ab |
| 213 | AM | Manicoré              | No Ab | No Ab | No Ab |
| 214 | AM | Manicoré              | No Ab | No Ab | No Ab |
| 215 | AM | Manicoré              | 128   | 128   | 128   |
| 216 | AM | Manicoré              | No Ab | No Ab | No Ab |
| 217 | AM | Manicoré              | No Ab | No Ab | No Ab |
| 218 | AM | Manicoré              | No Ab | No Ab | No Ab |
| 219 | AM | Manicoré              | 512   | 256   | 2048  |
| 220 | AM | Manicoré              | No Ab | No Ab | No Ab |
| 221 | AM | Manicoré              | No Ab | No Ab | No Ab |
| 222 | AM | Manicoré              | No Ab | No Ab | No Ab |
| 223 | AM | Manicoré              | No Ab | No Ab | No Ab |
| 224 | AM | Manicoré              | 256   | 512   | No Ab |
| 225 | AM | Manicoré              | No Ab | No Ab | No Ab |
| 226 | AM | Manicoré              | No Ab | No Ab | No Ab |
| 227 | AM | Manicoré              | 32    | 512   | 2048  |
| 228 | AM | Manicoré              | 128   | No Ab | No Ab |
| 229 | AM | Manicoré              | No Ab | No Ab | No Ab |
| 230 | AM | Manicoré              | No Ab | No Ab | 8     |
| 231 | AM | Manicoré              | 256   | 256   | 512   |
| 232 | AM | Manicoré              | 512   | 64    | 512   |
| 233 | AM | Manicoré              | No Ab | No Ab | No Ab |
| 234 | AM | Manicoré              | 512   | 16    | 32    |
| 235 | AM | Manicoré              | No Ab | No Ab | No Ab |
| 236 | AM | Manicoré              | 1024  | 256   | 2048  |
| 237 | AM | Presidente Figueiredo | 512   | 256   | 2048  |
| 238 | AM | Presidente Figueiredo | No Ab | No Ab | No Ab |
| 239 | AM | Rio Preto da Eva      | No Ab | No Ab | No Ab |
| 240 | AM | Tapauá                | No Ab | No Ab | No Ab |
| 241 | AM | Tapauá                | No Ab | No Ab | No Ab |
| 242 | AM | Apuí                  | No Ab | No Ab | No Ab |
| 243 | AM | Apuí                  | 1024  | 128   | No Ab |
| 244 | AM | Apuí                  | No Ab | No Ab | No Ab |
| 245 | AM | Apuí                  | No Ab | No Ab | No Ab |
| 246 | AM | Apuí                  | No Ab | No Ab | No Ab |

|     |    |                    |       |       |       |
|-----|----|--------------------|-------|-------|-------|
| 247 | AM | Apuí               | No Ab | No Ab | No Ab |
| 248 | AM | Apuí               | No Ab | No Ab | No Ab |
| 249 | AM | Apuí               | 16    | 64    | 128   |
| 250 | AM | Apuí               | No Ab | No Ab | No Ab |
| 251 | AM | Apuí               | 8     | No Ab | No Ab |
| 252 | AM | Apuí               | No Ab | No Ab | No Ab |
| 253 | AM | Apuí               | No Ab | No Ab | 8     |
| 254 | AM | Apuí               | No Ab | No Ab | 8     |
| 255 | AM | Apuí               | No Ab | No Ab | No Ab |
| 256 | AM | Apuí               | No Ab | No Ab | No Ab |
| 257 | AM | Apuí               | 256   | 2048  | 1024  |
| 258 | AM | Apuí               | No Ab | No Ab | No Ab |
| 259 | AM | Barreirinha        | No Ab | No Ab | No Ab |
| 260 | AM | Barreirinha        | No Ab | No Ab | No Ab |
| 261 | AM | Barreirinha        | 128   | 256   | 2048  |
| 262 | AM | Barreirinha        | No Ab | No Ab | No Ab |
| 263 | AM | Boa Vista do Ramos | No Ab | No Ab | No Ab |
| 264 | AM | Boa Vista do Ramos | No Ab | No Ab | No Ab |
| 265 | AM | Boa Vista do Ramos | No Ab | No Ab | No Ab |
| 266 | AM | Boa Vista do Ramos | No Ab | No Ab | No Ab |
| 267 | AM | Caapiranga         | No Ab | No Ab | No Ab |
| 268 | AM | Eirunepé           | No Ab | No Ab | No Ab |
| 269 | AM | Eirunepé           | No Ab | No Ab | No Ab |
| 270 | AM | Eirunepé           | No Ab | No Ab | No Ab |
| 271 | AM | Eirunepé           | No Ab | No Ab | No Ab |
| 272 | AM | Eirunepé           | No Ab | No Ab | No Ab |
| 273 | AM | Eirunepé           | No Ab | No Ab | No Ab |
| 274 | AM | Fonte Boa          | No Ab | No Ab | 8     |
| 275 | AM | Fonte Boa          | No Ab | No Ab | No Ab |
| 276 | AM | Fonte Boa          | No Ab | No Ab | No Ab |
| 277 | AM |                    | 64    | No Ab | No Ab |
| 278 | AM | Itamarati          | No Ab | No Ab | No Ab |
| 279 | AM | Itamarati          | No Ab | No Ab | No Ab |
| 280 | AM | Borba              | No Ab | No Ab | No Ab |
| 281 | AM | Borba              | No Ab | No Ab | No Ab |
| 282 | AM | Borba              | 256   | 128   | 2048  |



|     |    |                         |       |       |       |
|-----|----|-------------------------|-------|-------|-------|
| 283 | AM | Canutama                | No Ab | No Ab | No Ab |
| 284 | AM | Canutama                | No Ab | No Ab | No Ab |
| 285 | AM | Canutama                | No Ab | No Ab | No Ab |
| 286 | AM | Codajás                 | 16    | 256   | 256   |
| 287 | AM | Codajás                 | No Ab | No Ab | No Ab |
| 288 | AM | Codajás                 | No Ab | No Ab | No Ab |
| 289 | AM | Codajás                 | No Ab | No Ab | No Ab |
| 290 | AM | Itapiranga              | No Ab | No Ab | No Ab |
| 291 | AM | Itapiranga              | No Ab | No Ab | No Ab |
| 292 | AM | Maués                   | No Ab | No Ab | No Ab |
| 293 | AM | Maués                   | No Ab | No Ab | No Ab |
| 294 | AM | Maués                   | No Ab | No Ab | No Ab |
| 295 | AM | Nhamundá                | No Ab | No Ab | No Ab |
| 296 | AM | Nhamundá                | No Ab | No Ab | No Ab |
| 297 | AM | Nova Olinda do Norte    | No Ab | No Ab | No Ab |
| 298 | AM | Nova Olinda do Norte    | No Ab | No Ab | No Ab |
| 299 | AM | Nova Olinda do Norte    | No Ab | No Ab | No Ab |
| 300 | AM | Parintins               | No Ab | No Ab | No Ab |
| 301 | AM | Parintins               | No Ab | No Ab | No Ab |
| 302 | AM | Parintins               | No Ab | No Ab | No Ab |
| 303 | AM | Parintins               | No Ab | No Ab | No Ab |
| 304 | AM | Parintins               | 64    | 32    | 512   |
| 305 | AM | Parintins               | No Ab | No Ab | No Ab |
| 306 | AM | Parintins               | No Ab | No Ab | 8     |
| 307 | AM | Parintins               | 16    | No Ab | No Ab |
| 308 | AM | Parintins               | No Ab | No Ab | No Ab |
| 309 | AM | São Sebastião do Uatumã | No Ab | No Ab | No Ab |
| 310 | AM | Silves                  | No Ab | No Ab | No Ab |
| 311 | AM | Silves                  | No Ab | No Ab | No Ab |
| 312 | AM | Silves                  | No Ab | No Ab | No Ab |
| 313 | AM | Urucará                 | No Ab | No Ab | 8     |
| 314 | AM | Autazes                 | No Ab | No Ab | No Ab |
| 315 | AM | Autazes                 | No Ab | No Ab | No Ab |
| 316 | AM | Autazes                 | No Ab | No Ab | 8     |
| 317 | AM | Autazes                 | 8     | 64    | No Ab |
| 318 | AM | Autazes                 | No Ab | No Ab | No Ab |

|     |    |             |       |       |       |
|-----|----|-------------|-------|-------|-------|
| 319 | AM | Autazes     | No Ab | 8     | No Ab |
| 320 | AM | Autazes     | No Ab | No Ab | No Ab |
| 321 | AM | Autazes     | No Ab | No Ab | No Ab |
| 322 | AM | Autazes     | No Ab | No Ab | No Ab |
| 323 | AM | Autazes     | No Ab | 32    | 8     |
| 324 | AM | Autazes     | No Ab | No Ab | No Ab |
| 325 | AM | Autazes     | No Ab | No Ab | No Ab |
| 326 | AM | Autazes     | No Ab | 64    | 8     |
| 327 | AM | Autazes     | No Ab | No Ab | No Ab |
| 328 | AM | Autazes     | No Ab | No Ab | 8     |
| 329 | AM | Autazes     | No Ab | No Ab | 8     |
| 330 | AM | Autazes     | 32    | No Ab | No Ab |
| 331 | AM | Autazes     | No Ab | No Ab | No Ab |
| 332 | AM | Autazes     | No Ab | 1024  | 1024  |
| 333 | AM | Autazes     | No Ab | No Ab | No Ab |
| 334 | AM | Autazes     | 8     | No Ab | No Ab |
| 335 | AM | Autazes     | 32    | No Ab | No Ab |
| 336 | AM | Autazes     | No Ab | No Ab | 32    |
| 337 | AM | Autazes     | No Ab | 256   | 128   |
| 338 | AM | Autazes     | No Ab | No Ab | No Ab |
| 339 | AM | Autazes     | No Ab | No Ab | No Ab |
| 340 | AM | Itacoatiara | No Ab | No Ab | 8     |
| 341 | AM | Itacoatiara | No Ab | 256   | 2048  |
| 342 | AM | Itacoatiara | No Ab | No Ab | No Ab |
| 343 | AM | Itacoatiara | No Ab | No Ab | No Ab |
| 344 | AM | Itacoatiara | No Ab | No Ab | 8     |
| 345 | AM | Itacoatiara | No Ab | No Ab | No Ab |
| 346 | AM | Itacoatiara | 128   | No Ab | No Ab |
| 347 | AM | Itacoatiara | 16    | 64    | No Ab |
| 348 | AM | Itacoatiara | No Ab | No Ab | No Ab |
| 349 | AM | Tefé        | No Ab | 16    | No Ab |
| 350 | AM | Amaturá     | No Ab | No Ab | No Ab |
| 351 | AM | Anamã       | No Ab | No Ab | No Ab |
| 352 | AM | Careiro     | No Ab | No Ab | No Ab |
| 353 | AM | Careiro     | No Ab | No Ab | No Ab |
| 354 | AM | Careiro     | No Ab | No Ab | No Ab |

|     |    |                      |       |       |       |
|-----|----|----------------------|-------|-------|-------|
| 355 | AM | Careiro              | No Ab | No Ab | No Ab |
| 356 | AM | Careiro              | 8     | No Ab | No Ab |
| 357 | AM | Careiro              | 64    | No Ab | No Ab |
| 358 | AM | Careiro              | No Ab | No Ab | No Ab |
| 359 | AM | Careiro              | No Ab | No Ab | No Ab |
| 360 | AM | Careiro da Várzea    | 128   | 256   | 512   |
| 361 | AM | Itacoatiara          | No Ab | No Ab | No Ab |
| 362 | AM | Careiro da Várzea    | No Ab | No Ab | No Ab |
| 363 | AM | Careiro              | 256   | 64    | 512   |
| 364 | AM | Careiro              | 32    | No Ab | No Ab |
| 365 | AM | Careiro da Várzea    | No Ab | No Ab | No Ab |
| 366 | AM | Manaus               | 1024  | 256   | 1024  |
| 367 | AM | Careiro da Várzea    | No Ab | No Ab | No Ab |
| 368 | AM | Autazes              | No Ab | No Ab | No Ab |
| 369 | AM | Japurá               | No Ab | No Ab | No Ab |
| 370 | AM | Japurá               | No Ab | No Ab | No Ab |
| 371 | AM | Lábrea               | No Ab | No Ab | No Ab |
| 372 | AM | Lábrea               | No Ab | No Ab | 8     |
| 373 | AM | Lábrea               | No Ab | No Ab | No Ab |
| 374 | AM | Lábrea               | No Ab | No Ab | No Ab |
| 375 | AM | Lábrea               | No Ab | No Ab | No Ab |
| 376 | AM | Lábrea               | No Ab | No Ab | No Ab |
| 377 | AM | Lábrea               | No Ab | No Ab | No Ab |
| 378 | AM | Manacapuru           | No Ab | No Ab | No Ab |
| 379 | AM | Manacapuru           | No Ab | No Ab | No Ab |
| 380 | AM | Manaquiri            | No Ab | No Ab | No Ab |
| 381 | AM | Manaquiri            | No Ab | No Ab | No Ab |
| 382 | AM | Santo Antônio do Içá | No Ab | No Ab | No Ab |
| 383 | AM | Tabatinga            | No Ab | No Ab | No Ab |
| 384 | AM | Tonantins            | No Ab | No Ab | No Ab |
| 385 | AM | Tonantins            | No Ab | No Ab | 32    |
| 386 | AM | Urucurituba          | No Ab | No Ab | No Ab |
| 387 | AM | Urucurituba          | No Ab | No Ab | No Ab |
| 388 | AM | Urucurituba          | No Ab | No Ab | No Ab |
| 389 | AM | Urucurituba          | No Ab | No Ab | No Ab |
| 390 | AM | Urucurituba          | No Ab | No Ab | No Ab |

---

---

\* Brazil state: RR- Roraima; PA- Pará; AP- Amapá; AM- Amazonas.

\*\* Titers <8 are considered negative (No Ab).
