# Supplementary material for: HoBi-like Pestivirus Is Highly Prevalent in Cattle Herds in the Amazon Region (Northern Brazil)
Source: MDPI journal article supplement (doi:10.3390/v15020453), 2023-02-06
Supplement: s1 [file s1]

**Supplementary Materials:**

Table S1: Number of cattle (in million heads) in different regions of Brazil

| 3  | Region       | Federative State    | (n) million heads |
|----|--------------|---------------------|-------------------|
| 4  |              | Rondônia            | 15.1              |
| 5  |              | Acre                | 4.1               |
| 6  | NORTHERN     | Amazonas            | 1.5               |
| 7  |              | Roraima             | 0.9               |
| 8  |              | Pará                | 23.9              |
| 9  |              | Amapá               | 0.05              |
| 10 |              | Tocantins           | 10.1              |
| 11 | <b>Total</b> |                     | <b>55.6</b>       |
| 12 |              | Maranhão            | 8.5               |
| 13 |              | Piauí               | 1.4               |
| 14 |              | Ceará               | 2.6               |
| 15 | NORTHEAST    | Rio Grande do Norte | 1.1               |
| 16 |              | Paraíba             | 1.3               |
| 17 |              | Pernambuco          | 2.2               |
| 18 |              | Alagoas             | 1.3               |
| 19 |              | Sergipe             | 1.1               |
| 20 |              | Bahia               | 11.7              |
| 21 | <b>Total</b> |                     | <b>31.2</b>       |
| 22 |              | Mato Grosso do Sul  | 18.6              |
| 23 | CENTRAL-WEST | Mato Grosso         | 32.4              |
| 24 |              | Goiás               | 24.3              |
| 25 |              | Distrito Federal    | 0.08              |
| 26 | <b>Total</b> |                     | <b>75.4</b>       |
| 27 |              | Minas Gerais        | 22.9              |
| 28 | SOUTHEAST    | Espírito Santo      | 2.2               |
| 29 |              | Rio de Janeiro      | 2.7               |
| 30 |              | São Paulo           | 10.7              |
| 31 | <b>Total</b> |                     | <b>38.5</b>       |
| 32 |              | Paraná              | 8.1               |
| 33 | SOUTH        | Santa Catarina      | 4.5               |
| 34 |              | Rio Grande do Sul   | 11.1              |
| 35 | <b>Total</b> |                     | <b>23.7</b>       |

References: [35,36].

Table S2: Percentage of positive samples by titer for BVDV-1, 2 and HoBiPeV

| 31 | Titer*         | BVDV-1 (%) | BVDV-2 (%) | HoBiPeV (%) |
|----|----------------|------------|------------|-------------|
| 32 | 8 to <16       | 5          | 3          | 32          |
| 33 | 16 to <64      | 28         | 25         | 9           |
| 34 | 64 to <256     | 30         | 40         | 20          |
| 35 | 256 to < 1,024 | 30         | 25         | 22          |
| 36 | ≥1,024         | 7          | 5          | 17          |
| 37 | <b>Total</b>   | <b>100</b> | <b>100</b> | <b>100</b>  |

\* Titers 8 to <16 are considered low. Titers 16-128 are considered moderate. Titers ≥ 256 are considered high.

Table S3: Individual results for VNT titers for BVDV-1, 2 and HoBiPeV. (View excel.xls file)

Table S4: The major countries live cattle exporters worldwide.

44

| 45 | Country        | % Of world |
|----|----------------|------------|
| 46 | Mexico         | 24.9%      |
| 47 | European Union | 22.9%      |
| 48 | Australia      | 18.1%      |
| 49 | Canada         | 13.4%      |
| 50 | Brazil         | 8.5%       |
|    | Uruguay        | 6.2%       |

References: [36].

51
